# Supplementary material for: LncRNA MEG3 targeting miR-424-5p via MAPK signaling pathway mediates neuronal apoptosis in ischemic stroke
Source: publisher site journal article supplement (doi:10.18632/aging.102790), 2020-02-16
Supplement: Supplementary file [file aging-v12i4-102790-supplementary-material-SD1.pdf]

SUPPLEMENTARY FIGURE

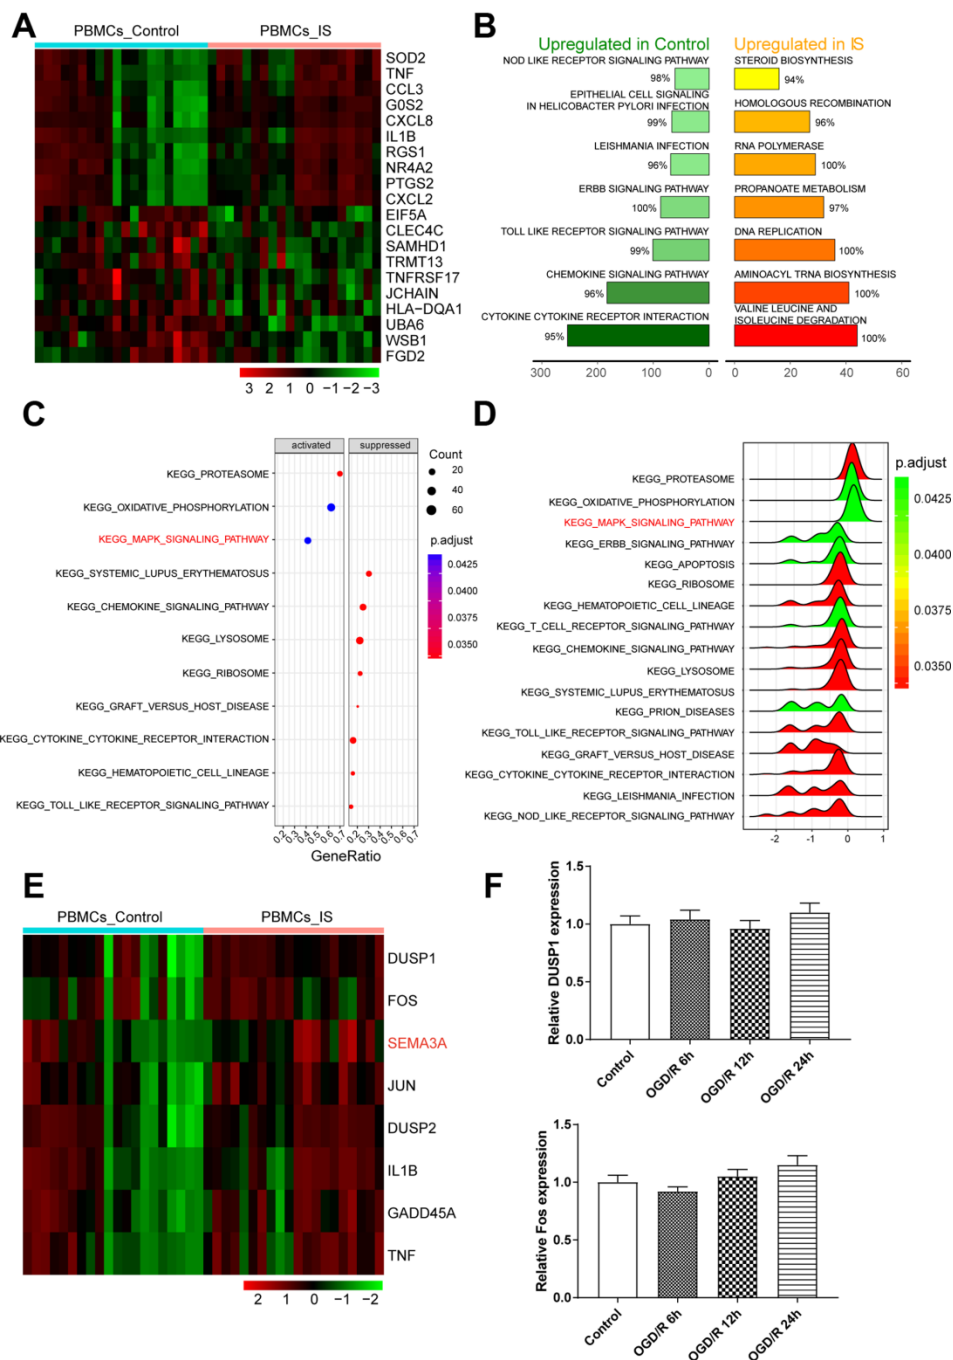

**Supplementary Figure 1. *Sema3A* was a highly expressed mRNA related to MAPK signaling pathway in IS.** (A) The heatmap we achieved during microarray analysis of GSE22255 showed the top 10 differentially expressed mRNAs in IS group. (B) 7 most significantly up-regulated Biological pathways in IS or control group were screened out and showed in Rankplot. (C, D) The dotplot and ridgeplot showed the significantly activated or suppressed pathways in IS. (E) The heatmap showed these significantly highly expressed mRNAs including *Sema3A* related to MAPK signaling pathway in IS group. (F) qRT-PCR to verify the expression of *DUSP1* and *FOS* in OGD/R cell lines, and no significant differences were detected. IS: ischemic stroke.
